# Supplementary material
Source: MDPI journal article supplement (https://www.mdpi.com/2073-4352/9/10/529)
Supplement: s1 [file s1]

Supporting Information

Trinodal self-penetrating nets from reactions of 1,4-bis(alkoxy)-2,5-bis(3,2':6',3''-terpyridin-4'-yl)benzene ligands with cobalt(II) thiocyanate

Giacomo Manfroni 1, Alessandro Prescimone 1, Stuart R. Batten 2, Y. Maximilian Klein 3, Dariusz J. Gawryluk 3, Edwin C. Constable 1 and Catherine E. Housecroft 1,*

1 Department of Chemistry, University of Basel, BPR 1096, Mattenstrasse 24a, CH-4058 Basel, Switzerland; giacomo.manfroni@unibas.ch (G.M.); alessandro.prescimone@unibas.ch (A.P.); edwin.constable@unibas.ch (E.C.C.); catherine.housecroft@unibas.ch (C.E.H.)

2 School of Chemistry, Monash University, Victoria 3800, Australia; [Stuart.Batten@monash.edu](mailto:Stuart.Batten@monash.edu)

3 Laboratory for Multiscale Materials Experiments, Paul Scherrer Institut, CH-5232 Villigen PSI, Switzerland; maximilian.klein@psi.ch (Y.M.K.)

***** Correspondence: catherine.housecroft@unibas.ch


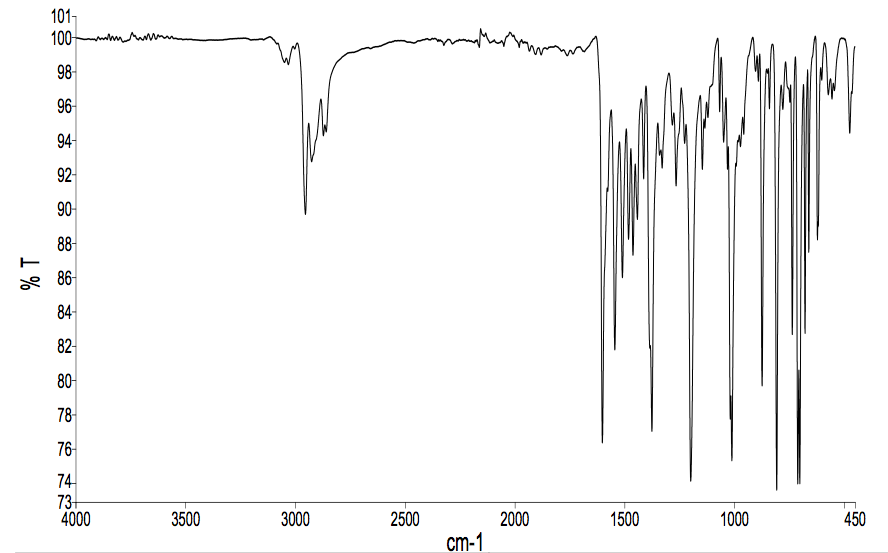


Figure S1. FT-IR spectrum of solid ligand **1**.


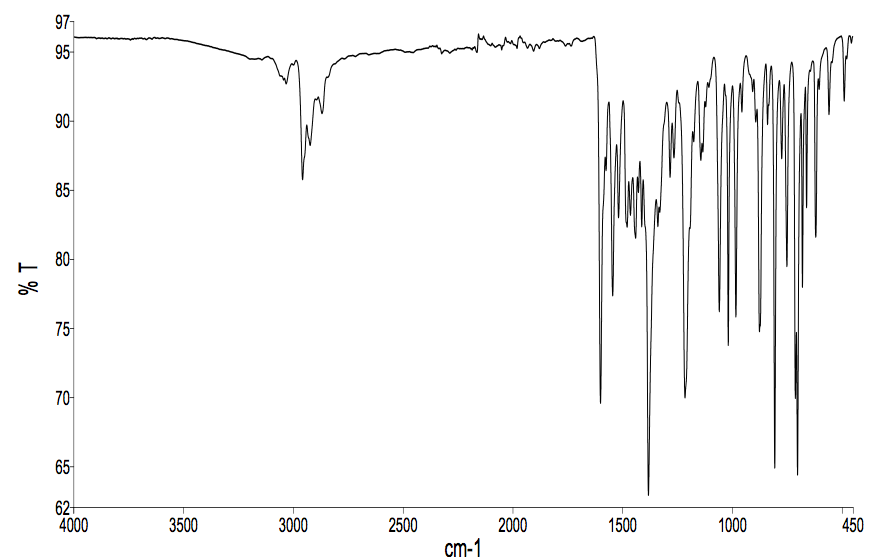


Figure S2. FT-IR spectrum of solid ligand **2**.


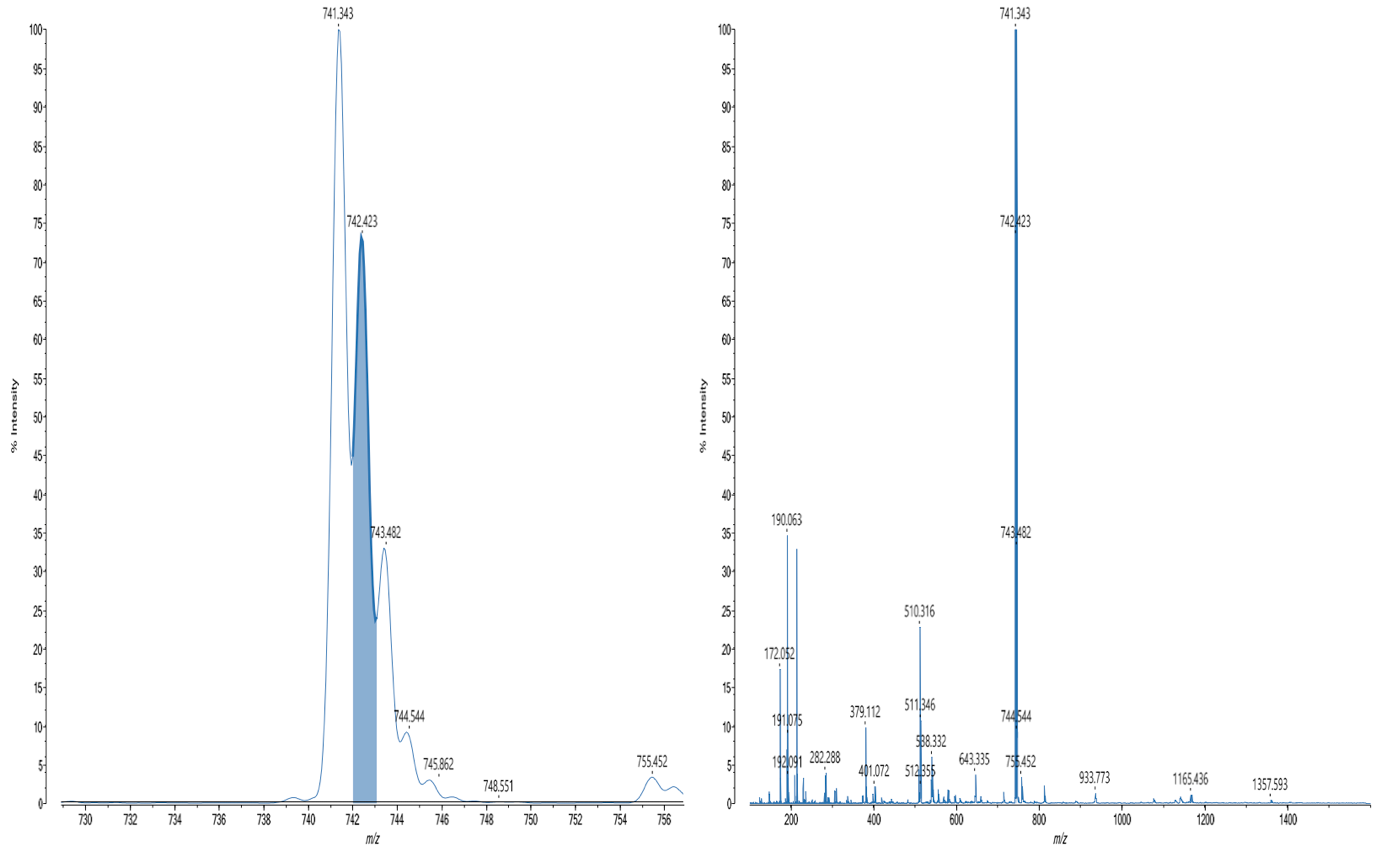


Figure S3. MALDI-TOF mass spectrum of **1** (right) and expansion of the [M+H]+ peak (left). The peaks around *m/z* 191 arise from the matrix (α-cyano-4-hydroxycinnamic acid).


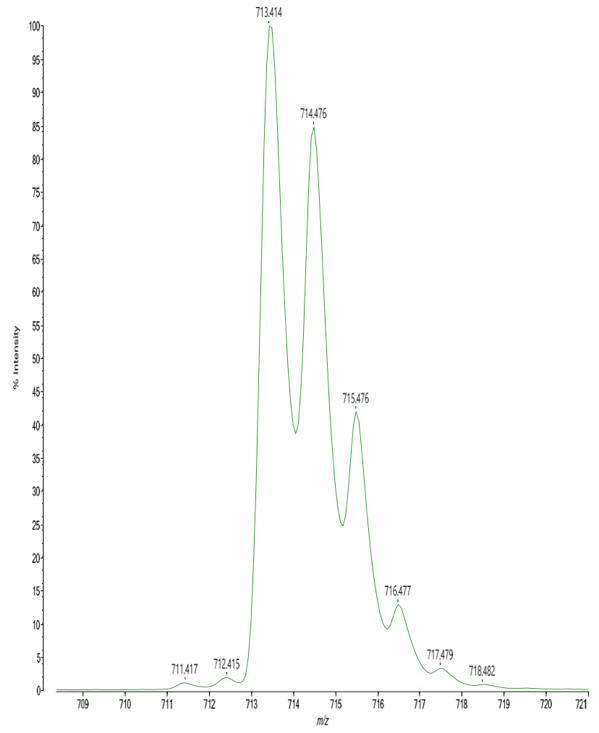


Figure S4. Expansion of the [M+H]+ peak in the MALDI-TOF mass spectrum of **2**.


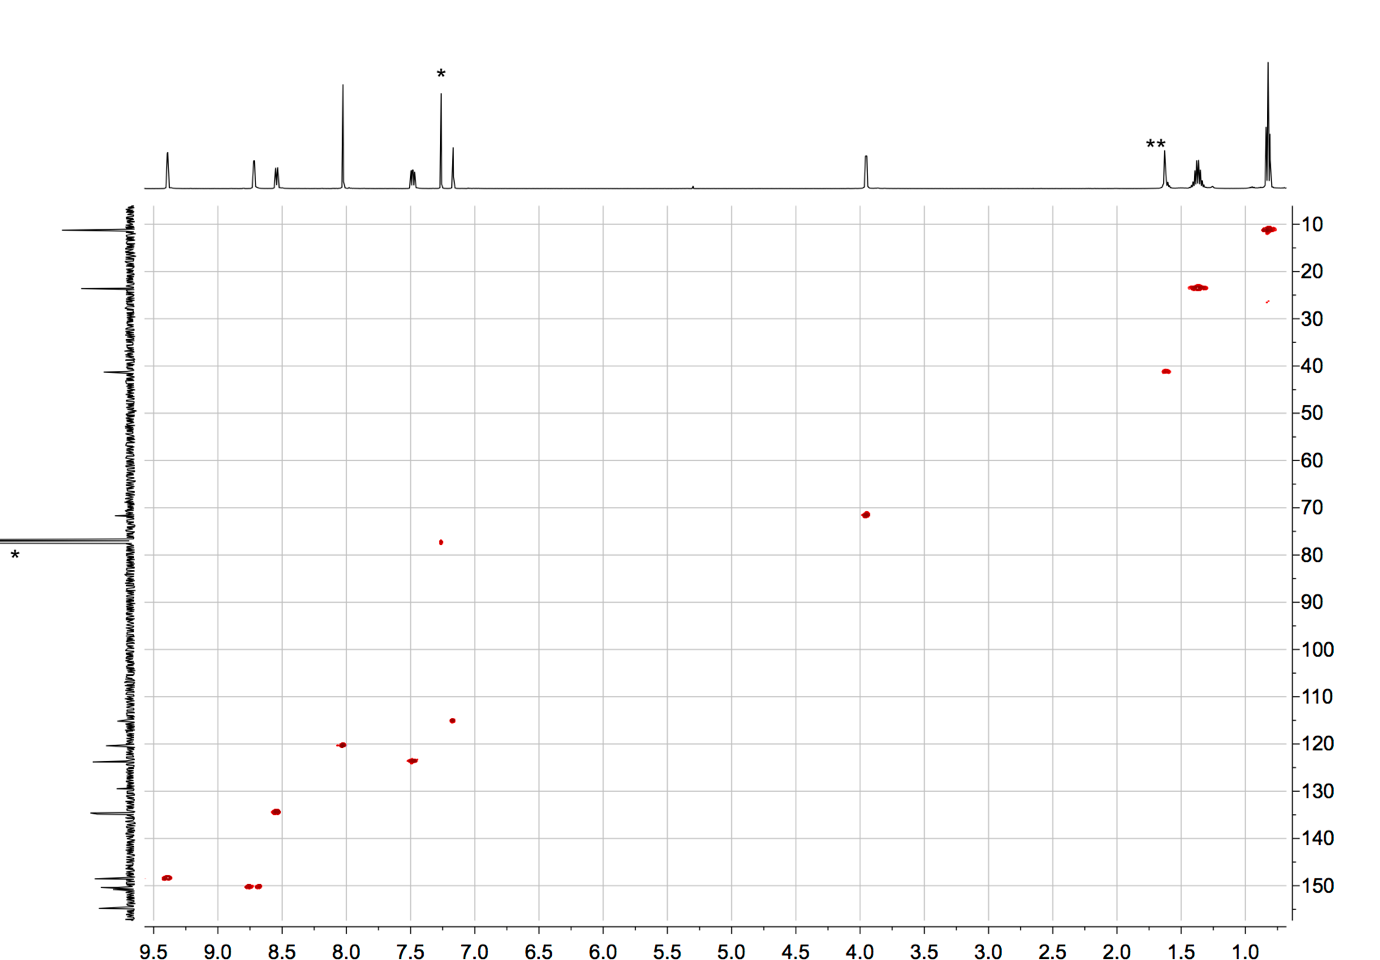


Figure S5. HMQC spectrum (1H 500 MHz, 13C 126 MHz, CDCl3, 298 K) of compound **1**. Chemical shifts in *δ* / ppm. * = CHCl3, ** = water.

Figure S6. HMBC spectrum (1H 500 MHz, 13C 126 MHz, CDCl3, 298 K) of compound **1**. Chemical shifts in *δ* / ppm. * = CHCl3, ** = water.


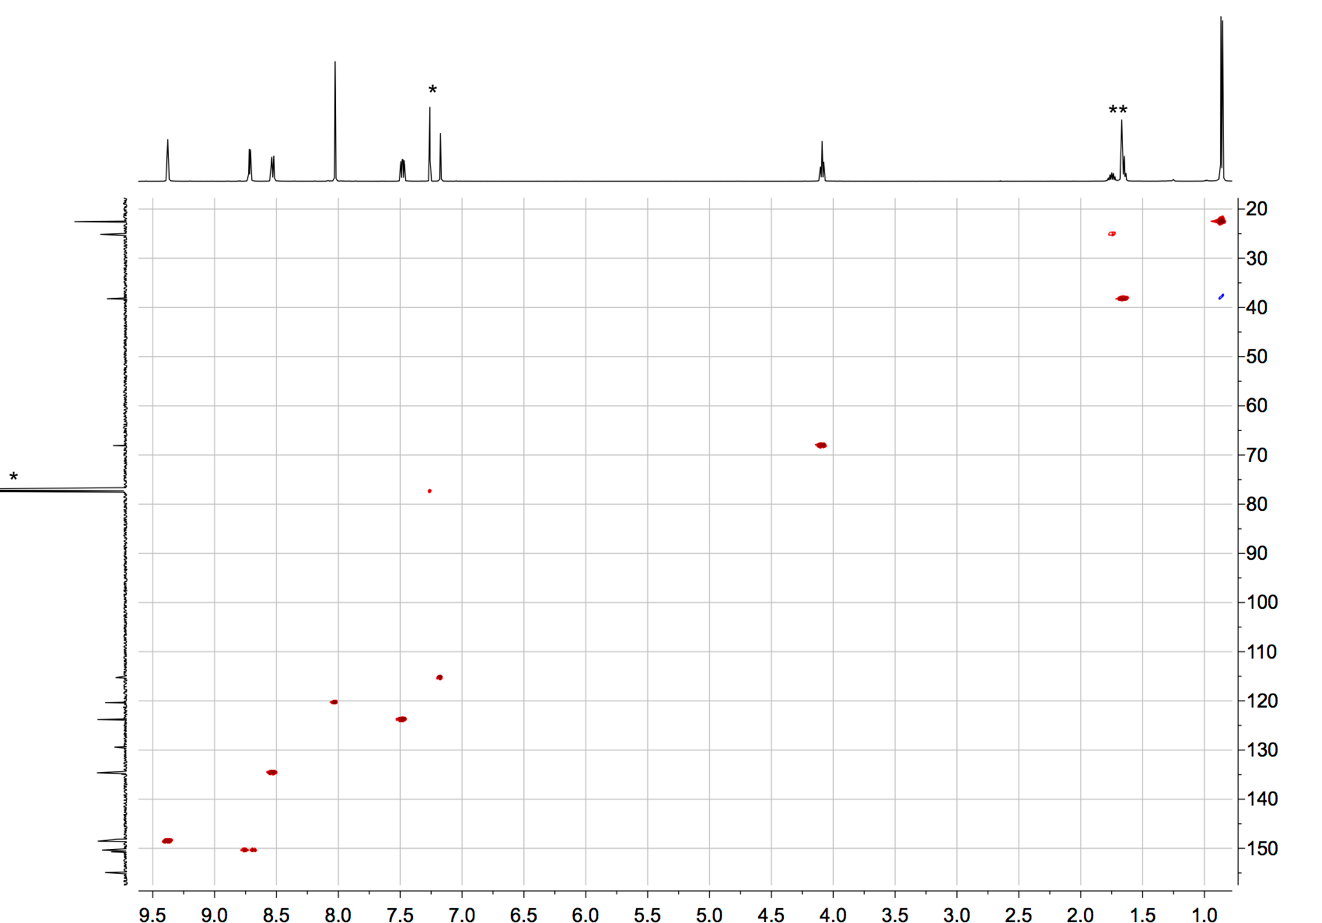


Figure S7. HMQC spectrum (1H 500 MHz, 13C 126 MHz, CDCl3, 298 K) of compound **2**. Chemical shifts in *δ* / ppm. * = CHCl3, ** = water.


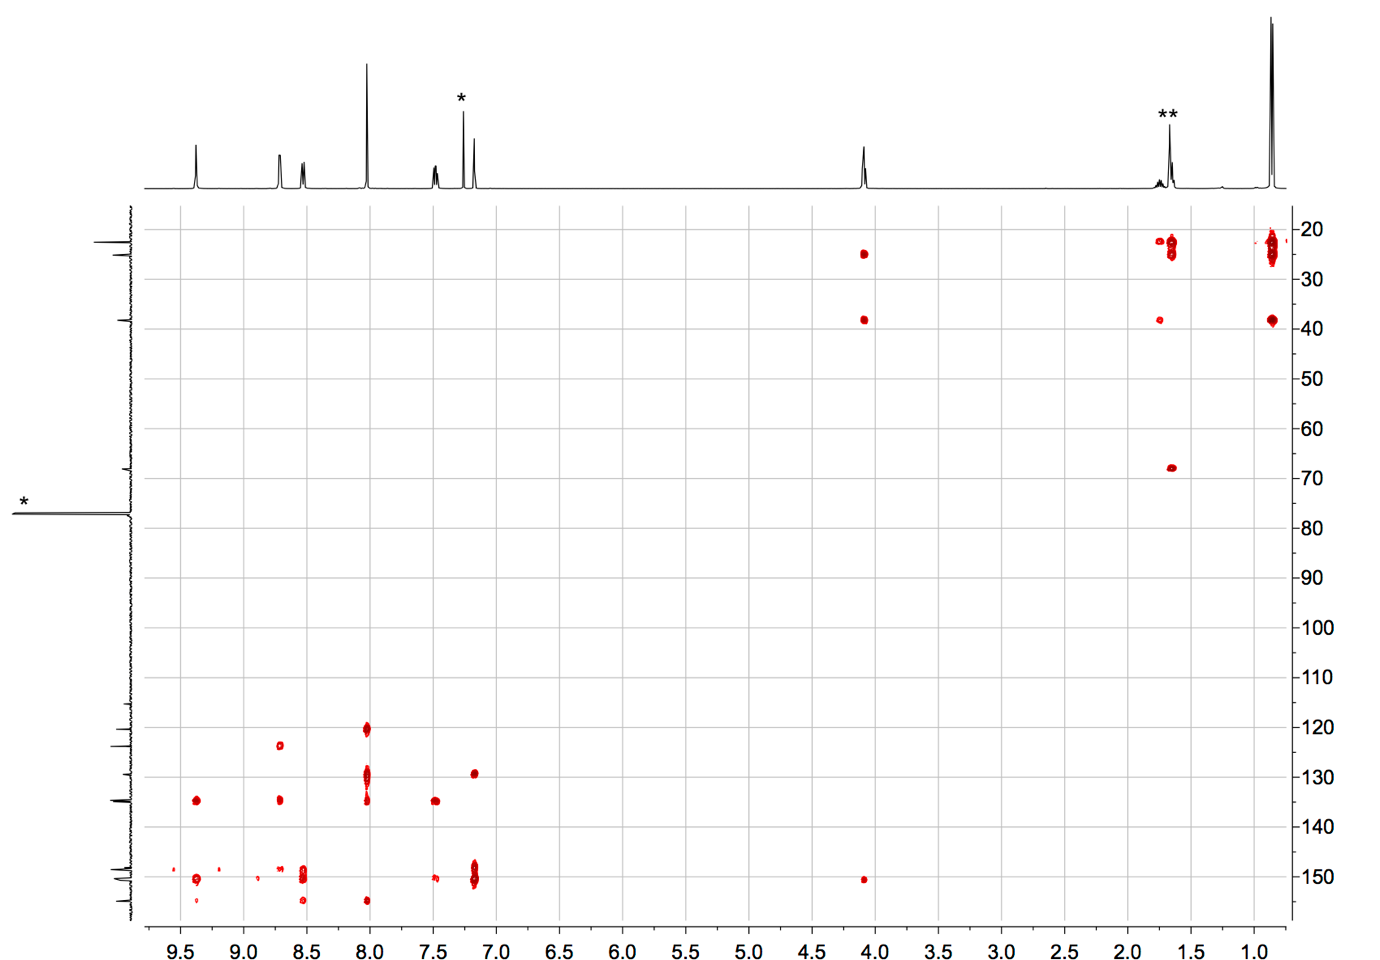


Figure S8. HMBC spectrum (1H 500 MHz, 13C 126 MHz, CDCl3, 298 K) of compound **2**. Chemical shifts in *δ* / ppm. * = CHCl3, ** = water.


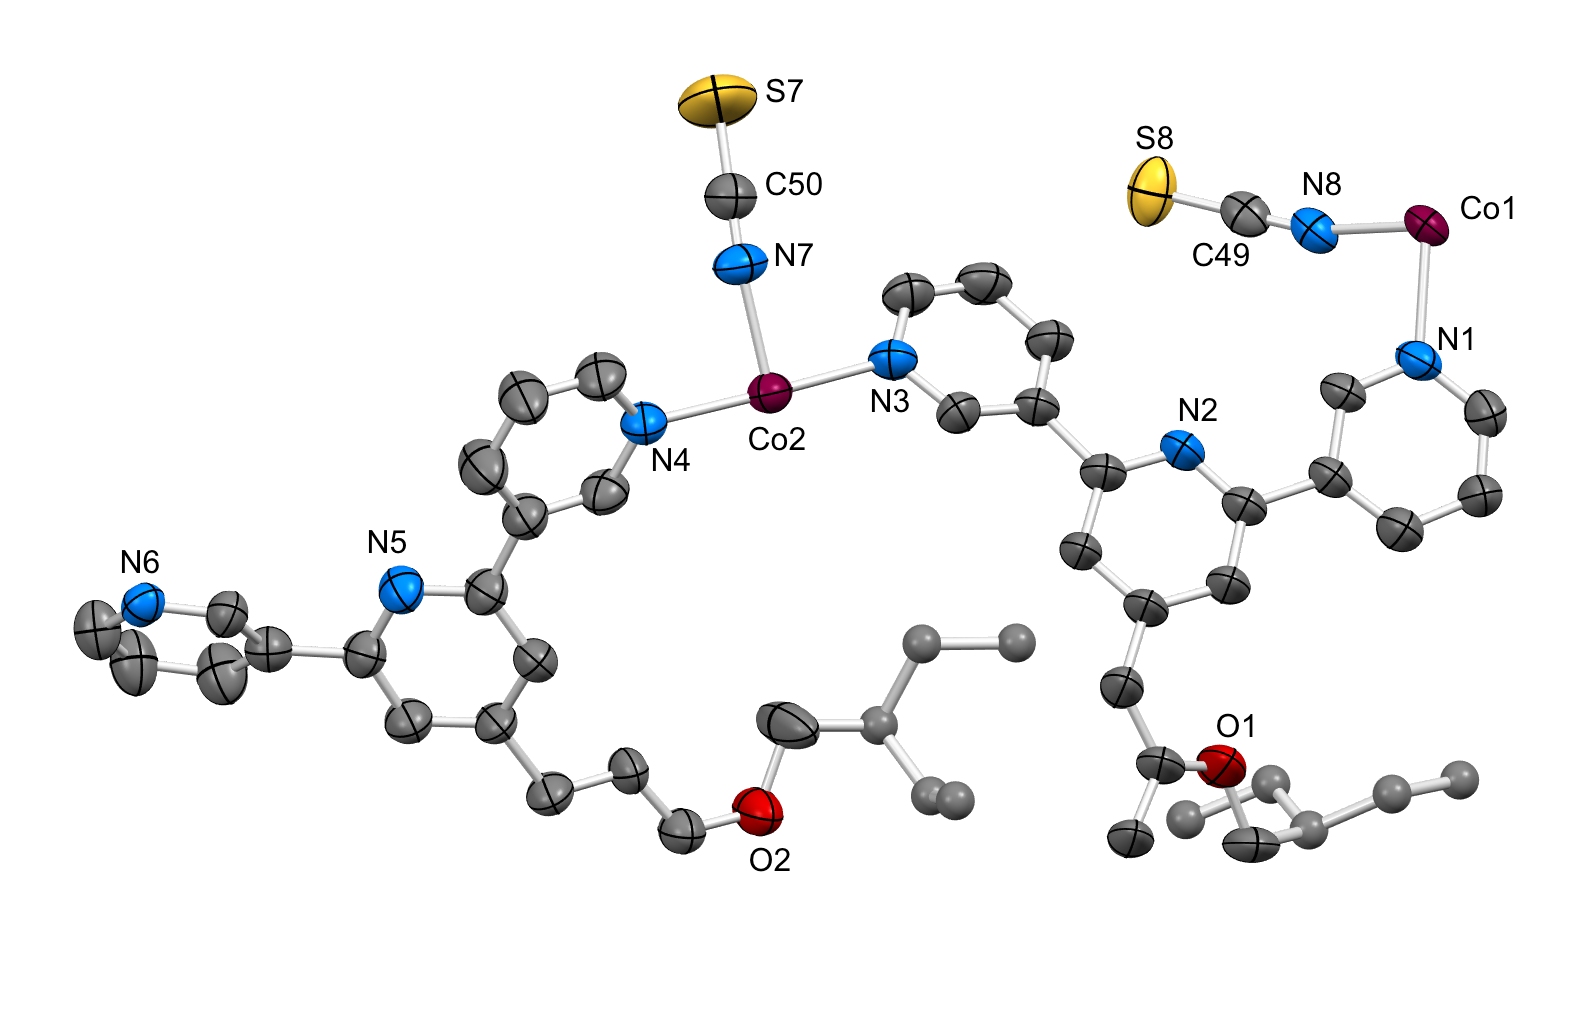


Figure S9. The contents of the asymmetric unit in [{Co(**1**)(NCS)2}**.**MeOH**.**3CHCl3]*n*. Hydrogen atoms and solvent molecules are omitted; ellipsoids are plotted at the 40% probability level. The aliphatic chains were refined isotropically (see Materials and Methods section).


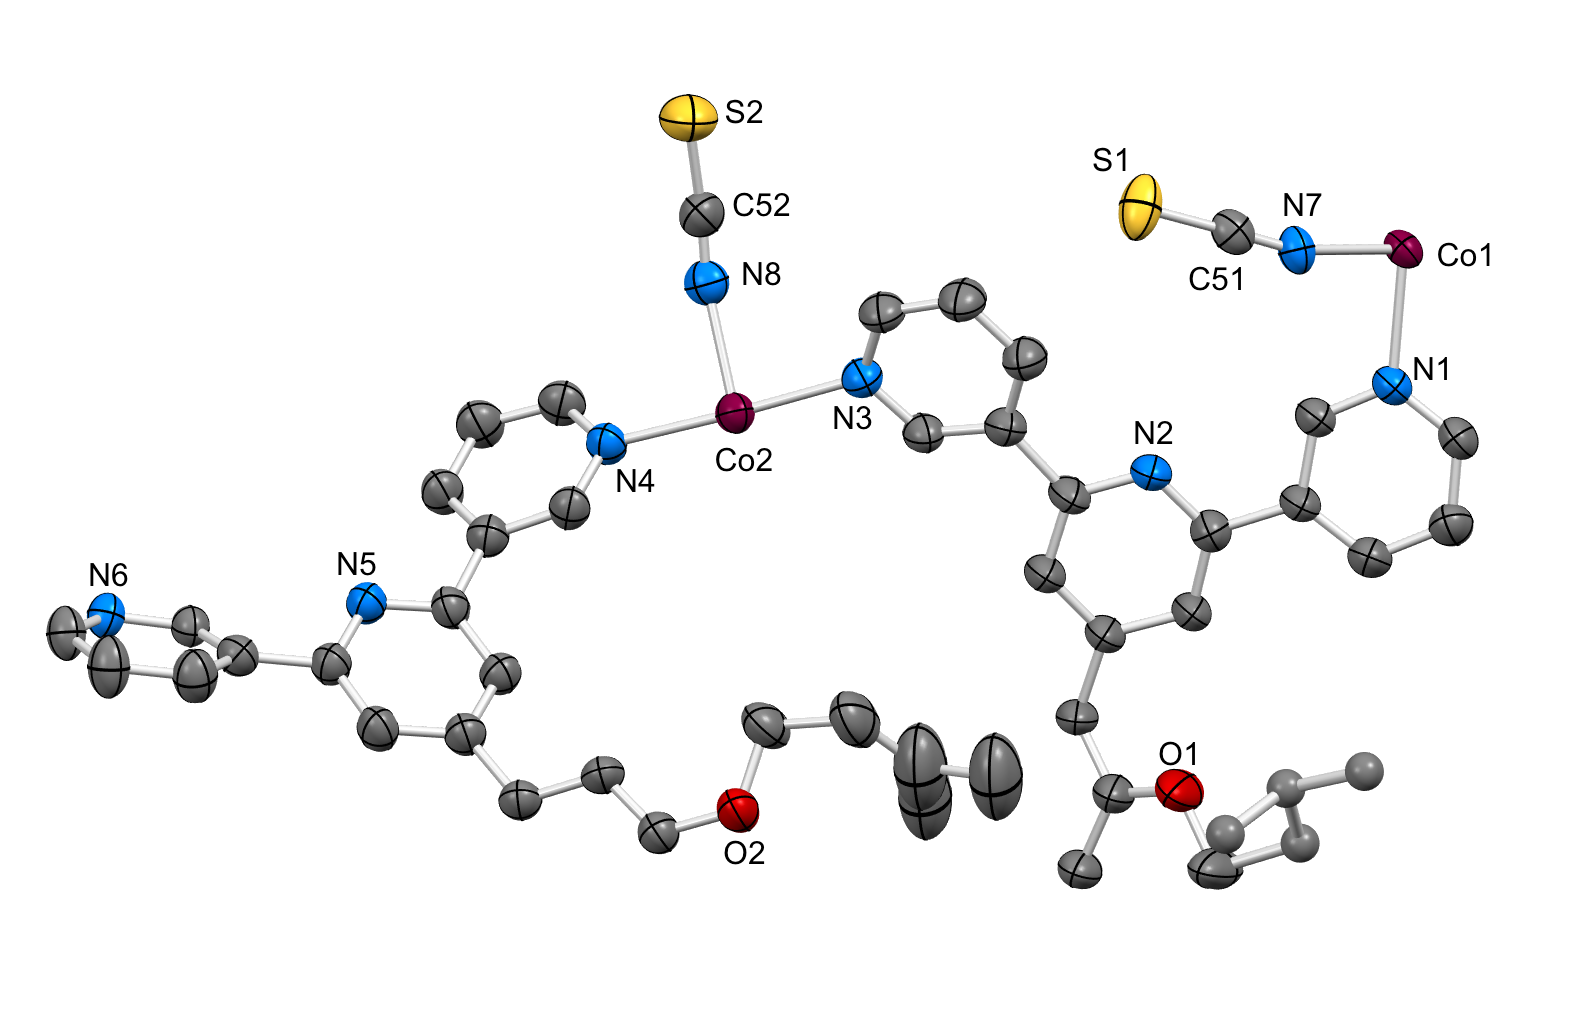


Figure S10. The contents of the asymmetric unit in [{Co(**2**)(NCS)2}**.**0.8MeOH**.**1.8CHCl3]*n*. Hydrogen atoms and solvent molecules are omitted; ellipsoids are plotted at the 40% probability level. Both aliphatic chains and the thiocyanate ligand with S2 are disordered and only one site for each is shown; part of one aliphatic chain was refined isotropically (see Materials and Methods section).


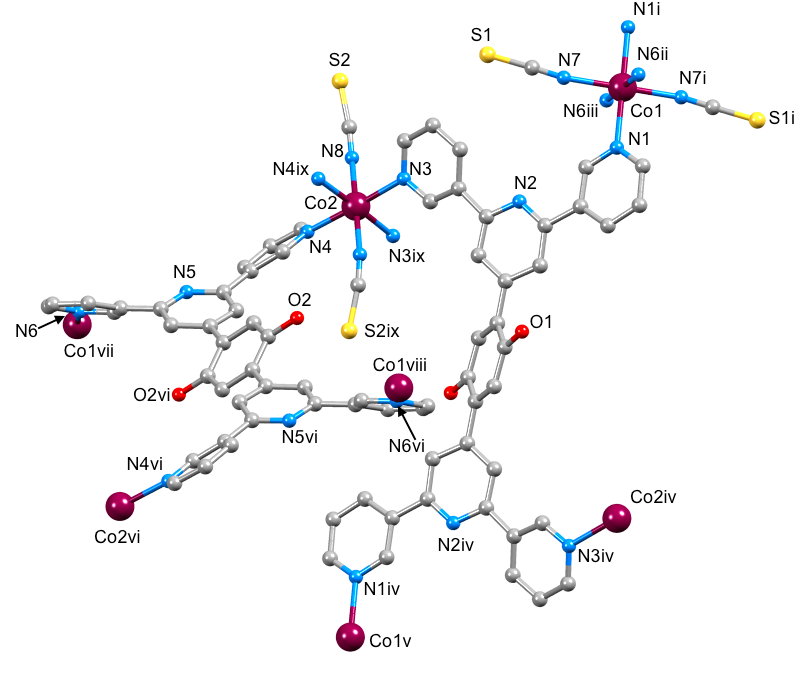


Figure S11. The repeat unit in the coordination network of [{Co(**2**)(NCS)2}**.**0.8MeOH**.**1.8CHCl3]*n* with symmetry-generated atoms. For clarity, H atoms and solvent molecules are omitted, and only the O atoms of the alkoxy groups are shown. Both aliphatic chains and the thiocyanate ligand with S2 are disordered and only one site for each is shown; part of one aliphatic chain was refined isotropically (see Materials and Methods section). Symmetry codes: i = 1–*x*,–*y*, –*z*; ii = *x*, 1–*y*, –1/2+*z*; iii = 1–*x*,–1+*y*, 1/2–*z*; iv = 3/2–*x*, 1/2–*y*, 1–*z*; v = 1/2+*x*, 1/2+*y*, 1+*z*; vi = 3/2–*x*, 3/2–*y*, 1–*z*; vii = 1–*x*, 1+*y*, 1/2–*z*; viii = 3/2–*x*, 1/2+*y*, 1/2–*z*; ix = 1–*x*, *y*, 1/2–*z*. Selected bond distances: Co1–N1 = 2.175(6), Co1–N7 = 2.091(5), Co1–N6ii = 2.244(6), Co2–N3 = 2.138(6), Co2–N4 = 2.134(6), Co2–N8 = 2.107(7) Å.


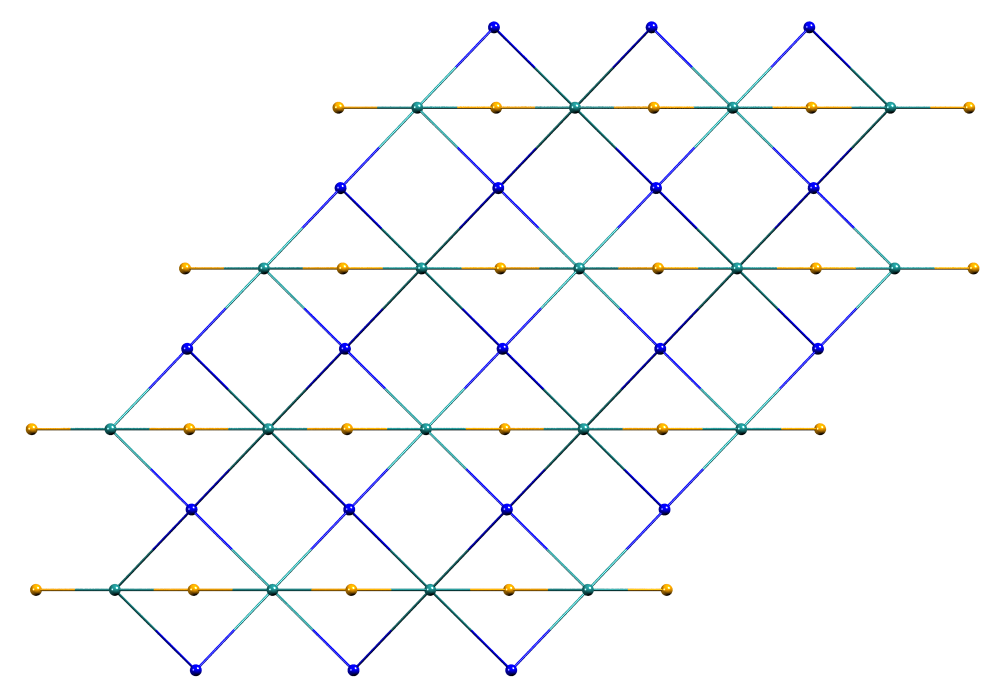


Figure S12. Part of the 3D net in [{Co(**1**)(NCS)2}**.**MeOH**.**3CHCl3]*n* viewed down the crystallographic *b*-axis. Colour code for the nodes: Co1 blue, Co2 orange, ligand centroids green. See main discussion for other colour codings.
